# Supplementary material
Source: PubMed Central journal article supplement (PMC9765220)
Supplement: mmc1.pdf [file mmc1.pdf]

# THE LANCET

## Diabetes & Endocrinology

### Supplementary appendix

This appendix formed part of the original submission and has been peer reviewed. We post it as supplied by the authors.

Supplement to: Misra S, Barron E, Vamos E, et al. Temporal trends in emergency admissions for diabetic ketoacidosis in people with diabetes in England before and during the COVID-19 pandemic: a population-based study. *Lancet Diabetes Endocrinol* 2021; published online Sept 2. [http://dx.doi.org/10.1016/S2213-8587\(21\)00208-4](http://dx.doi.org/10.1016/S2213-8587(21)00208-4).

## Supplementary Data

Supplementary table 1: Number of individuals with DKA during the first wave, post first wave and second wave and the mean number of individuals in equivalent time periods in 2017-20

|                 | Number of individuals | Number of individuals with more than one admission | %   | 95% CI lower | 95% CI upper |
|-----------------|-----------------------|----------------------------------------------------|-----|--------------|--------------|
| Mar-Jun 2020    | 7,474                 | 693                                                | 9%  | 9%           | 10%          |
| Mar-Jun 2017-19 | 6,777                 | 773                                                | 11% | 11%          | 12%          |
| Jul-Oct 2020    | 7,504                 | 758                                                | 10% | 9%           | 11%          |
| Jul-Oct 2017-19 | 6,909                 | 819                                                | 12% | 11%          | 13%          |
| Nov-Feb 2021    | 8,926                 | 780                                                | 9%  | 8%           | 9%           |
| Nov-Feb 2017-20 | 8,117                 | 932                                                | 11% | 11%          | 12%          |

Supplementary Table 2: Number of admissions with DKA during the first wave, post first wave and second wave with a COVID-19 diagnosis

|                         | Number of admissions | COVID-19 diagnosis | %   |
|-------------------------|----------------------|--------------------|-----|
| First wave (total)      | 8,553                | 1,007              | 12% |
| Type 1                  | 4,041                | 242                | 6%  |
| Type 2                  | 2,831                | 644                | 23% |
| Newly diagnosed         | 1,681                | 121                | 7%  |
| Post first wave (total) | 8,729                | 391                | 4%  |
| Type 1                  | 4,491                | 120                | 3%  |
| Type 2                  | 2,613                | 231                | 9%  |
| Newly diagnosed         | 1,625                | 40                 | 2%  |
| Second wave (total)     | 10,235               | 2,405              | 23% |
| Type 1                  | 4,337                | 522                | 12% |
| Type 2                  | 3,912                | 1,574              | 40% |
| Newly diagnosed         | 1,986                | 309                | 16% |

Supplementary table 3: Median age (and interquartile range) for admissions with DKA during the first wave, post first wave and second wave and equivalent time periods in 2017-20

|                   | Type 1     | Type 2     | Newly diagnosed |
|-------------------|------------|------------|-----------------|
| Mar-June 2020     | 34 (24-52) | 64 (52-76) | 30 (13-51)      |
| Mar-Jun 2017-19   | 30 (21-48) | 64 (51-76) | 27 (13-49)      |
| Jul-Oct 2020      | 33 (23-51) | 64 (53-75) | 24 (11-47)      |
| Jul-Oct 2017-19   | 30 (21-48) | 63 (51-76) | 23 (11-47)      |
| Nov 2020-Feb 2021 | 33 (23-52) | 63 (53-75) | 31 (13-52)      |
| Nov-Feb 2017-20   | 31 (22-49) | 64 (53-77) | 26 (12-49)      |

Supplementary table 4: Demographic characteristics for emergency admissions coded with DKA during March to June 2020 (the first wave), July to October 2020 (post-first wave), November 2020 to February 2021 (second wave) and the mean of equivalent time periods in 2017-2020.

|         | Mar-Jun<br>2017-19 |        |       | Mar-Jun<br>2020 |        |       | Jul-Oct<br>2017-19 |        |       | Jul-Oct<br>2020 |        |       | Nov-Feb<br>2017-20 |        |       | Nov-Feb<br>2020-21 |        |       |
|---------|--------------------|--------|-------|-----------------|--------|-------|--------------------|--------|-------|-----------------|--------|-------|--------------------|--------|-------|--------------------|--------|-------|
|         | Type 1             | Type 2 | New   | Type 1          | Type 2 | New   | Type 1             | Type 2 | New   | Type 1          | Type 2 | New   | Type 1             | Type 2 | New   | Type 1             | Type 2 | New   |
| Total   | 4,965              | 2,010  | 1,072 | 4,041           | 2,831  | 1,681 | 5,208              | 2,011  | 1,041 | 4,491           | 2,613  | 1,625 | 5,769              | 2,608  | 1,234 | 4,337              | 3,912  | 1,986 |
| Male    | 2,419              | 1,078  | 630   | 2,039           | 1,609  | 1,070 | 2,527              | 1,072  | 610   | 2,199           | 1,437  | 953   | 2,816              | 1,392  | 726   | 2,167              | 2,222  | 1,253 |
|         | 49%                | 54%    | 59%   | 50%             | 57%    | 64%   | 49%                | 53%    | 59%   | 49%             | 55%    | 59%   | 49%                | 53%    | 59%   | 50%                | 57%    | 63%   |
| Female  | 2,546              | 933    | 442   | 2,001           | 1,220  | 611   | 2,680              | 938    | 431   | 2,287           | 1,173  | 668   | 2,952              | 1,215  | 507   | 2,168              | 1,684  | 730   |
|         | 51%                | 46%    | 41%   | 50%             | 43%    | 36%   | 51%                | 47%    | 41%   | 51%             | 45%    | 41%   | 51%                | 47%    | 41%   | 50%                | 43%    | 37%   |
| Unknown | 0                  | 1      | 0     | 1               | 2      | 0     | 1                  | 0      | 0     | 5               | 3      | 4     | 1                  | 0      | 0     | 6                  | 2      | 31    |
|         | 0%                 | 0%     | 0%    | 0%              | 0%     | 0%    | 0%                 | 0%     | 0%    | 0%              | 0%     | 0%    | 0%                 | 0%     | 0%    | 0%                 | 0%     | 2%    |
| <19     | 683                | 9      | 371   | 429             | 6      | 554   | 715                | 8      | 409   | 555             | 3      | 667   | 784                | 9      | 451   | 529                | 5      | 628   |
|         | 14%                | 0%     | 35%   | 11%             | 0%     | 33%   | 14%                | 0%     | 39%   | 12%             | 0%     | 41%   | 14%                | 0%     | 37%   | 12%                | 0%     | 32%   |
| 19-29   | 1,726              | 66     | 175   | 1,232           | 46     | 240   | 1,800              | 79     | 170   | 1,440           | 45     | 230   | 1,876              | 66     | 188   | 1,336              | 58     | 287   |
|         | 35%                | 3%     | 16%   | 30%             | 2%     | 14%   | 35%                | 4%     | 16%   | 32%             | 2%     | 14%   | 33%                | 3%     | 15%   | 31%                | 1%     | 14%   |
| 30-39   | 828                | 106    | 104   | 717             | 127    | 188   | 876                | 111    | 99    | 746             | 100    | 165   | 998                | 114    | 121   | 740                | 189    | 218   |
|         | 17%                | 5%     | 10%   | 18%             | 4%     | 11%   | 17%                | 6%     | 10%   | 17%             | 4%     | 10%   | 17%                | 4%     | 10%   | 17%                | 5%     | 11%   |
| 40-49   | 586                | 251    | 113   | 527             | 333    | 184   | 585                | 246    | 93    | 583             | 313    | 158   | 710                | 325    | 113   | 530                | 462    | 227   |
|         | 12%                | 12%    | 11%   | 13%             | 12%    | 11%   | 11%                | 12%    | 9%    | 13%             | 12%    | 10%   | 12%                | 12%    | 9%    | 12%                | 12%    | 11%   |
| 50-59   | 468                | 398    | 114   | 463             | 639    | 221   | 524                | 395    | 97    | 482             | 550    | 182   | 603                | 532    | 125   | 493                | 861    | 249   |
|         | 9%                 | 20%    | 11%   | 11%             | 23%    | 13%   | 10%                | 20%    | 9%    | 11%             | 21%    | 11%   | 10%                | 20%    | 10%   | 11%                | 22%    | 13%   |
| 60-69   | 280                | 405    | 76    | 267             | 594    | 124   | 289                | 408    | 65    | 281             | 603    | 84    | 339                | 540    | 82    | 315                | 933    | 177   |
|         | 6%                 | 20%    | 7%    | 7%              | 21%    | 7%    | 6%                 | 20%    | 6%    | 6%              | 23%    | 5%    | 6%                 | 21%    | 7%    | 7%                 | 24%    | 9%    |
| 70+     | 392                | 775    | 61    | 406             | 1,086  | 99    | 418                | 763    | 53    | 404             | 999    | 79    | 457                | 1,019  | 81    | 394                | 1,404  | 106   |
|         | 8%                 | 39%    | 6%    | 10%             | 38%    | 6%    | 8%                 | 38%    | 5%    | 9%              | 38%    | 5%    | 8%                 | 39%    | 7%    | 9%                 | 36%    | 5%    |
| unknown | 1                  | 1      | 58    | 0               | 0      | 71    | 1                  | 1      | 57    | 0               | 0      | 60    | 1                  | 3      | 73    | 0                  | 0      | 94    |
|         | 0%                 | 0%     | 5%    | 0%              | 0%     | 4%    | 0%                 | 0%     | 5%    | 0%              | 0%     | 4%    | 0%                 | 0%     | 6%    | 0%                 | 0%     | 5%    |
| White   | 4,278              | 1,567  | 717   | 3,425           | 2,033  | 1,018 | 4,495              | 1,562  | 689   | 3,840           | 1,966  | 1,002 | 4,964              | 2,041  | 849   | 3,646              | 2,711  | 1,196 |

|                          | Mar-Jun<br>2017-19 |        |     | Mar-Jun<br>2020 |        |     | Jul-Oct<br>2017-19 |        |     | Jul-Oct<br>2020 |        |     | Nov-Feb<br>2017-20 |        |     | Nov-Feb<br>2020-21 |        |     |
|--------------------------|--------------------|--------|-----|-----------------|--------|-----|--------------------|--------|-----|-----------------|--------|-----|--------------------|--------|-----|--------------------|--------|-----|
|                          | Type 1             | Type 2 | New | Type 1          | Type 2 | New | Type 1             | Type 2 | New | Type 1          | Type 2 | New | Type 1             | Type 2 | New | Type 1             | Type 2 | New |
| non-white                | 86%                | 78%    | 67% | 85%             | 72%    | 61% | 86%                | 78%    | 66% | 86%             | 75%    | 62% | 86%                | 78%    | 69% | 84%                | 69%    | 60% |
|                          | 428                | 290    | 208 | 386             | 535    | 394 | 439                | 293    | 219 | 378             | 399    | 375 | 477                | 356    | 240 | 443                | 801    | 463 |
| unknown                  | 9%                 | 14%    | 19% | 10%             | 19%    | 23% | 8%                 | 15%    | 21% | 8%              | 15%    | 23% | 8%                 | 14%    | 19% | 10%                | 20%    | 23% |
|                          | 259                | 153    | 147 | 230             | 263    | 269 | 274                | 156    | 134 | 273             | 248    | 248 | 328                | 211    | 145 | 248                | 400    | 327 |
|                          | 5%                 | 8%     | 14% | 6%              | 9%     | 16% | 5%                 | 8%     | 13% | 6%              | 9%     | 15% | 6%                 | 8%     | 12% | 6%                 | 10%    | 16% |
| IMD 1 (most deprived)    | 1,683              | 605    | 272 | 1,416           | 816    | 443 | 1,726              | 632    | 263 | 1,546           | 781    | 416 | 1,915              | 780    | 298 | 1,561              | 1,192  | 551 |
|                          | 34%                | 30%    | 25% | 35%             | 29%    | 26% | 33%                | 31%    | 25% | 34%             | 30%    | 26% | 33%                | 30%    | 24% | 36%                | 30%    | 28% |
| IMD 2                    | 1,133              | 477    | 225 | 943             | 709    | 388 | 1,224              | 455    | 206 | 1,028           | 624    | 353 | 1,348              | 619    | 270 | 1,013              | 927    | 403 |
|                          | 23%                | 24%    | 21% | 23%             | 25%    | 23% | 23%                | 23%    | 20% | 23%             | 24%    | 22% | 23%                | 24%    | 22% | 23%                | 24%    | 20% |
| IMD 3                    | 863                | 387    | 186 | 703             | 550    | 303 | 900                | 362    | 172 | 788             | 489    | 275 | 1,018              | 479    | 205 | 699                | 759    | 361 |
|                          | 17%                | 19%    | 17% | 17%             | 19%    | 18% | 17%                | 18%    | 17% | 18%             | 19%    | 17% | 18%                | 18%    | 17% | 16%                | 19%    | 18% |
| IMD 4                    | 702                | 305    | 155 | 558             | 416    | 211 | 735                | 304    | 143 | 644             | 383    | 281 | 814                | 393    | 182 | 606                | 568    | 290 |
|                          | 14%                | 15%    | 14% | 14%             | 15%    | 13% | 14%                | 15%    | 14% | 14%             | 15%    | 17% | 14%                | 15%    | 15% | 14%                | 15%    | 15% |
| IMD 5 (least deprived)   | 528                | 221    | 130 | 386             | 316    | 226 | 550                | 234    | 123 | 437             | 318    | 215 | 599                | 309    | 144 | 414                | 443    | 243 |
|                          | 11%                | 11%    | 12% | 10%             | 11%    | 13% | 11%                | 12%    | 12% | 10%             | 12%    | 13% | 10%                | 12%    | 12% | 10%                | 11%    | 12% |
| unknown                  | 56                 | 15     | 105 | 35              | 24     | 110 | 74                 | 24     | 134 | 48              | 18     | 85  | 74                 | 27     | 134 | 44                 | 23     | 138 |
|                          | 1%                 | 1%     | 10% | 1%              | 1%     | 7%  | 1%                 | 1%     | 13% | 1%              | 1%     | 5%  | 1%                 | 1%     | 11% | 1%                 | 1%     | 7%  |
| East of England          | 560                | 230    | 115 | 435             | 315    | 200 | 600                | 230    | 105 | 530             | 300    | 170 | 645                | 285    | 135 | 500                | 405    | 230 |
|                          | 11%                | 11%    | 11% | 11%             | 11%    | 12% | 12%                | 11%    | 10% | 12%             | 11%    | 10% | 11%                | 11%    | 11% | 12%                | 10%    | 12% |
| London                   | 635                | 310    | 180 | 505             | 565    | 350 | 640                | 300    | 175 | 540             | 410    | 320 | 735                | 405    | 210 | 550                | 820    | 360 |
|                          | 13%                | 15%    | 17% | 12%             | 20%    | 21% | 12%                | 15%    | 17% | 12%             | 16%    | 20% | 13%                | 16%    | 17% | 13%                | 21%    | 18% |
| Midlands                 | 915                | 395    | 180 | 735             | 485    | 295 | 975                | 400    | 170 | 830             | 480    | 300 | 1,065              | 510    | 225 | 800                | 685    | 380 |
|                          | 18%                | 20%    | 17% | 18%             | 17%    | 18% | 19%                | 20%    | 16% | 18%             | 18%    | 18% | 18%                | 20%    | 18% | 18%                | 18%    | 19% |
| North East and Yorkshire | 880                | 310    | 125 | 740             | 370    | 205 | 930                | 335    | 130 | 810             | 400    | 205 | 1,030              | 400    | 145 | 815                | 525    | 250 |
|                          | 18%                | 15%    | 12% | 18%             | 13%    | 12% | 18%                | 17%    | 12% | 18%             | 15%    | 13% | 18%                | 15%    | 12% | 19%                | 13%    | 13% |

|            | Mar-Jun<br>2017-19 |        |     | Mar-Jun<br>2020 |        |     | Jul-Oct<br>2017-19 |        |     | Jul-Oct<br>2020 |        |     | Nov-Feb<br>2017-20 |        |     | Nov-Feb<br>2020-21 |        |     |
|------------|--------------------|--------|-----|-----------------|--------|-----|--------------------|--------|-----|-----------------|--------|-----|--------------------|--------|-----|--------------------|--------|-----|
|            | Type 1             | Type 2 | New | Type 1          | Type 2 | New | Type 1             | Type 2 | New | Type 1          | Type 2 | New | Type 1             | Type 2 | New | Type 1             | Type 2 | New |
| North West | 790                | 290    | 145 | 665             | 420    | 195 | 770                | 290    | 125 | 690             | 415    | 205 | 880                | 400    | 145 | 625                | 575    | 255 |
|            | 16%                | 14%    | 14% | 16%             | 15%    | 12% | 15%                | 14%    | 12% | 15%             | 16%    | 13% | 15%                | 15%    | 12% | 14%                | 15%    | 13% |
| South East | 660                | 255    | 150 | 580             | 410    | 225 | 700                | 290    | 135 | 630             | 390    | 230 | 800                | 365    | 160 | 595                | 575    | 280 |
|            | 13%                | 13%    | 14% | 14%             | 14%    | 13% | 13%                | 14%    | 13% | 14%             | 15%    | 14% | 14%                | 14%    | 13% | 14%                | 15%    | 14% |
| South West | 460                | 185    | 85  | 345             | 235    | 125 | 510                | 145    | 90  | 415             | 195    | 125 | 545                | 215    | 110 | 395                | 285    | 130 |
|            | 9%                 | 9%     | 8%  | 9%              | 8%     | 7%  | 10%                | 7%     | 9%  | 9%              | 7%     | 8%  | 9%                 | 8%     | 9%  | 9%                 | 7%     | 7%  |
| unknown    | 70                 | 30     | 90  | 35              | 35     | 85  | 75                 | 25     | 110 | 45              | 20     | 75  | 65                 | 30     | 100 | 55                 | 40     | 95  |
|            | 1%                 | 1%     | 8%  | 1%              | 1%     | 5%  | 1%                 | 1%     | 11% | 1%              | 1%     | 5%  | 1%                 | 1%     | 8%  | 1%                 | 1%     | 5%  |

Supplementary Table 5: Numbers of people diagnosed with Type 1 diabetes and Type 2 diabetes recorded in the National Diabetes Audit, and the estimated number of people in England without diabetes

| Year    | Type 1  | Type 2    | Without Type 1 or Type 2 diabetes |
|---------|---------|-----------|-----------------------------------|
| 2016/17 | 221,622 | 2,633,055 | 52,413,390                        |
| 2017/18 | 242,910 | 2,866,670 | 52,509,850                        |
| 2018/19 | 247,390 | 2,990,546 | 52,739,242                        |
| 2019/20 | 251,525 | 3,118,388 | 52,917,048                        |

Supplementary Table 6: Incidence rates for type 1 and type 2 diabetes per 100,000 people with diabetes and newly diagnosed diabetes per 100,000 resident population and Incidence Rate Ratios during the first wave, post-first wave and second wave

|                 | First wave      |              |                      | Post-first wave |              |                      | Second wave     |               |                      |
|-----------------|-----------------|--------------|----------------------|-----------------|--------------|----------------------|-----------------|---------------|----------------------|
|                 | Mar-Jun 2017-19 | Mar-Jun 2020 | Incidence Rate Ratio | Jul-Oct 2017-19 | Jul-Oct 2020 | Incidence Rate Ratio | Nov-Feb 2017-20 | Nov 20-Feb 21 | Incidence Rate Ratio |
| Type 1 Diabetes | 2,092           | 1,607        | 0.77                 | 2,195           | 1,786        | 0.81                 | 2,431           | 1,724         | 0.71                 |
| Type 2 diabetes | 71              | 91           | 1.28                 | 71.05           | 83.79        | 1.18                 | 92              | 125           | 1.36                 |
| Newly diagnosed | 2.0             | 3.2          | 1.56                 | 2.0             | 3.1          | 1.55                 | 2.3             | 3.8           | 1.60                 |



Supplementary Table 7: Number of in-hospital deaths for patients with DKA during March to June 2020 (the first wave), July to October 2020 (post-first wave), November 2020 to February 2021 (second wave) and the mean of equivalent time periods in 2017-2020.

|                 | Number of admissions | Died in hospital | % died in hospital |
|-----------------|----------------------|------------------|--------------------|
| Mar-Jun 2020    | 8,553                | 658              | 8%                 |
| Type 1          | 4,041                | 115              | 3%                 |
| Type 2          | 2,831                | 485              | 17%                |
| Newly diagnosed | 1,681                | 58               | 3%                 |
| Mar-Jun 2017-19 | 8,048                | 303              | 4%                 |
| Type 1          | 4,965                | 72               | 1%                 |
| Type 2          | 2,010                | 205              | 10%                |
| Newly diagnosed | 1,072                | 26               | 2%                 |
| Jul-Oct 2020    | 8,729                | 412              | 5%                 |
| Type 1          | 4,491                | 80               | 2%                 |
| Type 2          | 2,613                | 304              | 12%                |
| Newly diagnosed | 1,625                | 28               | 2%                 |
| Jul-Oct 2017-19 | 8,260                | 284              | 3%                 |
| Type 1          | 5,208                | 87               | 2%                 |
| Type 2          | 2,011                | 179              | 9%                 |
| Newly diagnosed | 1,041                | 18               | 2%                 |
| Nov-Feb 2021    | 10,235               | 968              | 9%                 |
| Type 1          | 4,337                | 134              | 3%                 |
| Type 2          | 3,912                | 752              | 19%                |
| Newly diagnosed | 1,986                | 82               | 4%                 |
| Nov-Feb 2017-20 | 9,610                | 414              | 4%                 |
| Type 1          | 5,769                | 105              | 2%                 |
| Type 2          | 2,608                | 278              | 11%                |
| Newly diagnosed | 1,234                | 30               | 2%                 |

Supplementary table 8: Adjusted odds ratio for death in hospital for patients admitted as an emergency with DKA between March 2020 and June 2020, July 2020 and October 2020 and November 2020 and February 2021

|                      |                        | Odds Ratio | 95% CI lower | 95% CI upper | P value |
|----------------------|------------------------|------------|--------------|--------------|---------|
| Time period          | Jul-Oct 2020           | 1.00       |              |              |         |
|                      | Mar-Jun 2020           | 1.26       | 1.09         | 1.45         | 0.002   |
|                      | Nov20-Feb 21           | 1.14       | 0.99         | 1.32         | 0.053   |
| COVID diagnosis      | No COVID diagnosis     | 1.00       |              |              |         |
|                      | COVID diagnosis        | 4.76       | 4.25         | 5.33         | <0.0001 |
| Diabetes type        | Type 1                 | 1.00       |              |              |         |
|                      | Type 2                 | 1.92       | 1.68         | 2.21         | <0.0001 |
|                      | Newly diagnosed        | 1.24       | 0.99         | 1.56         | 0.059   |
| Sex                  | Male                   | 1.00       |              |              |         |
|                      | Female                 | 0.95       | 0.85         | 1.05         | 0.32    |
| Ethnicity            | White                  | 1.00       |              |              |         |
|                      | non-white              | 1.23       | 1.05         | 1.43         | 0.011   |
|                      | Newly diagnosed        | 1.13       | 0.95         | 1.36         | 0.17    |
| Age                  | <19                    | 0.02       | 0.00         | 0.13         | 0.0001  |
|                      | 19-29                  | 0.08       | 0.03         | 0.17         | <0.0001 |
|                      | 30-39                  | 0.43       | 0.28         | 0.66         | 0.0001  |
|                      | 40-49                  | 1.00       |              |              |         |
|                      | 50-59                  | 1.87       | 1.45         | 2.39         | <0.0001 |
|                      | 60-69                  | 4.06       | 3.21         | 5.15         | <0.0001 |
|                      | 70+                    | 9.14       | 7.28         | 11.46        | <0.0001 |
| Deprivation quintile | IMD 1 (most deprived)  | 1.27       | 1.06         | 1.52         | 0.010   |
|                      | IMD 2                  | 1.23       | 1.02         | 1.48         | 0.029   |
|                      | IMD 3                  | 1.07       | 0.89         | 1.30         | 0.47    |
|                      | IMD 4                  | 1.11       | 0.91         | 1.35         | 0.31    |
|                      | IMD 5 (least deprived) | 1.00       |              |              |         |

\* Data shown are the results of a multivariable logistic regression model which included the explanatory variables shown, plus region
